# Supplementary material for: Transformation of the hydride-containing dinitrosyl iron complex [(NO)2Fe(η2-BH4)]− into [(NO)2Fe(η3-HCS2)]−via reaction with CS2
Source: Royal Society of Chemistry journal article supplement (doi:10.1039/c8dt04714f), 2019-01-01
Supplement: c8dt04714f1.pdf [file c8dt04714f1.pdf]

## Supporting Information

### Transformation of Hydride-Containing Dinitrosyl Iron Complex $[(\text{NO})_2\text{Fe}(\eta^2\text{-BH}_4)]^-$ into $[(\text{NO})_2\text{Fe}(\eta^3\text{-HCS}_2)]^-$ via Reaction with $\text{CS}_2$

Huang-Chia Huang,<sup>a</sup> Wei-Min Ching,<sup>b</sup> Yu-Ting Tseng,<sup>a,c</sup> Chien-Hong Chen,<sup>\*d</sup> and Tsai-Te Lu<sup>\*a,e</sup>

#### Affiliations:

<sup>a</sup>Department of Chemistry, Chung Yuan Christian University, Taoyuan, 32023, Taiwan.

<sup>b</sup>Instrumentation Center, National Taiwan Normal University, Taipei, 106, Taiwan

<sup>c</sup>Department of Chemistry, National Tsing Hua University, Hsinchu, 30013, Taiwan.

<sup>d</sup>Department of Medical Applied Chemistry, Chung Shan Medical University and Department of Medical Education, Chung Shan Medical University Hospital, Taichung 40201, Taiwan

<sup>e</sup>Institute of Biomedical Engineering, National Tsing Hua University, Hsinchu, 30013, Taiwan.

*\*To whom correspondence should be addressed*

*E-mail: cchwind@csmu.edu.tw (C.-H.C.); tlu@mx.nthu.edu.tw (T.-T.L.)*

## Experimental Section.

Manipulations, reactions, and transfers were conducted under  $N_{2(g)}$  according to Schlenk techniques or in a glovebox (under  $N_{2(g)}$  atmosphere). Organic solvents were distilled under  $N_{2(g)}$  from appropriate drying agents (acetonitrile ( $CH_3CN$ ) and dichloromethane ( $CH_2Cl_2$ ) from  $CaH_2$ ; n-hexane, diethyl ether, and tetrahydrofuran (THF) from sodium benzophenone) and stored in dried,  $N_2$ -filled flasks over 4 Å molecular sieves. Nitrogen was purged through these solvents before use. Solvent was transferred to the reaction vessel via stainless cannula under positive pressure of  $N_2$ .

Compounds  $[PPN][^{15}NO_2]$ ,  $[^{15}NO][BF_4]$ ,<sup>1</sup>  $[PPN][Fe(CO)_3(^{15}NO)]$ ,<sup>2</sup>  $[(NO)_2Fe(TMEDA)]$  (TMEDA = tetramethylenediamine),  $[(^{15}NO)_2Fe(TMEDA)]$ ,<sup>3</sup> and  $NaS_2CH_4$  were prepared according to the reported procedures. The reagents 18-crown-6-ether (Alfa Aesar), TMEDA (Alfa Aesar), sodium borohydride/borodeuteride (Alfa Aesar), ammonia borane (Sigma), 9-borabicyclononane (9-BBN) (ACROS), pinacolborane (Alfa Aesar), borane tetrahydrofuran complex solution (Aldrich), and carbon disulfide (Sigma) were used as received. Infrared spectra of the  $\nu_{NO}$  and  $\nu_{B-H/D}$  stretching frequencies were recorded on a JASCO FT/IR-4200 spectrometer with sealed solution cells (0.1 mm,  $CaF_2$  windows). UV-vis spectra were recorded on a JASCO V-630 spectrometer.  $^1H$ ,  $^{11}B$ ,  $^{13}C$ , and  $^{15}N$  NMR spectra were obtained on a Bruker AVANCE 300 MHz and Varian Unity-600 MHz spectrometer, whereas  $BF_3$  ( $\delta = 0$  ppm) and urea ( $\delta = -298.73$  ppm) were used as external standard for  $^{11}B$  and  $^{15}N$  NMR, respectively. All electrochemical measurements were performed in a three-electrode cell with a CHI model 611E potentiostat (CH Instrument) instrumentation. Cyclic voltammogram of dinitrosyl iron complex was obtained in  $O_2$ -free THF using 0.1 M  $[n-Bu_4N][PF_6]$  as the supporting electrolyte. The potential was measured at 298 K vs  $Ag/AgNO_3$  reference electrode (0.01 M  $AgNO_3$ ) using a glassy carbon working

electrode (surface area = 0.0707 cm<sup>2</sup>) and a platinum wire auxiliary electrode at a scan rate of 0.1 V/s. The potentials are reported against the ferrocenium/ferrocene (Fc<sup>+</sup>/Fc) couple.

**Reaction of Complex [(NO)<sub>2</sub>Fe(TMEDA)] (1) and NH<sub>3</sub>BH<sub>3</sub>, BH<sub>3</sub> • THF, 9-BBN (9-borabicyclononane), and HBPIn (pinacolborane), respectively.** Compounds [(NO)<sub>2</sub>Fe(TMEDA)] (**1**) (0.023 g, 0.1 mmol) and NH<sub>3</sub>BH<sub>3</sub> (0.015 g, 0.5 mmol) were dissolved in THF (5 mL) and then stirred under N<sub>2</sub> at ambient temperature for 12 h. No change of indicative IR  $\nu_{\text{NO}}$  stretching frequencies of complex **1** at 1697 s, 1644 s cm<sup>-1</sup> demonstrated that complex **1** is unreactive toward NH<sub>3</sub>BH<sub>3</sub>. Reactions of complexes **1** with BH<sub>3</sub> • THF, 9-BBN, and HBPIn, respectively, as well as reactions of complex [(NO)<sub>2</sub>Fe(CO)<sub>2</sub>] with NH<sub>3</sub>BH<sub>3</sub>/BH<sub>3</sub> • THF/9-BBN/HBPIn were carried out in a similar fashion, while no reaction was observed.

**Preparation of [Cation][(NO)<sub>2</sub>Fe( $\eta^2$ -BH<sub>4</sub>)] (2) (Cation = Na-18-crown-6-ether or PPN).** A 25-mL Schlenk tube was loaded with compounds [(NO)<sub>2</sub>Fe(TMEDA)] (**1**) (0.278 g, 1.2 mmol), NaBH<sub>4</sub> (0.038 g, 1.0 mmol) and 18-crown-6-ether (0.264 g, 1.0 mmol), and the contents in the tube were dissolved in THF (5 mL). The reaction solution was stirred at ambient temperature under N<sub>2(g)</sub> atmosphere for 1 h and then the mixture solution was filtered through Celite to remove the insoluble solid. Hexane was further added to the filtrate to precipitate the dark-brown solid. The dark-brown solid was washed with diethyl ether (25 mL) to remove the excess complex [(NO)<sub>2</sub>Fe(TMEDA)] (**1**). After drying the resulting dark-brown solid under vacuum, the dark-brown complex [Na-18-crown-6-ether][(NO)<sub>2</sub>Fe( $\eta^2$ -BH<sub>4</sub>)] (**2-Na**) (yield 0.31 g, 73.5%) was afforded. Recrystallization from THF solution of complex **2** layered with hexane at -20 °C for a week led to dark-brown crystals suitable for X-ray crystallography. IR  $\nu_{\text{NO}}$ : 1708 s, 1654 s cm<sup>-1</sup> (THF); 1714 s, 1651 s cm<sup>-1</sup> (KBr). <sup>1</sup>H

NMR (300 MHz, d-THF, 298 K)  $\delta$  3.62 (s, 24H, 18-crown-6-ether), -2.13 (q, 4H, BH<sub>4</sub>,  $^1J_{\text{BH}} = 84$  Hz) ppm.  $^{15}\text{N}$  NMR (61 MHz, d-THF)  $\delta$  10.21 ppm. Absorption spectrum (THF) [ $\lambda_{\text{max}}$ , nm ( $\epsilon$ , M<sup>-1</sup>cm<sup>-1</sup>): 327 (890), 388 (785).

Complex [PPN][[(NO)<sub>2</sub>Fe( $\eta^2$ -BH<sub>4</sub>)]] (**2-PPN**) was prepared in a similar manner through the reaction of complex **1** and [PPN][BH<sub>4</sub>]. IR  $\nu_{\text{NO}}$ : 1707 s, 1653 s cm<sup>-1</sup> (THF); 1714 s, 1651 s cm<sup>-1</sup> (KBr).  $^1\text{H}$  NMR (300 MHz, d-THF, 298 K)  $\delta$  7.68 (s, 6H, PPN), 7.59 (s, 12H, PPN), 7.51 (s, 12H, PPN), -2.08 (q, 4H, BH<sub>4</sub>,  $^1J_{\text{BH}} = 84$  Hz) ppm.  $^1\text{H}$  NMR (600 MHz, d-THF, 213 K)  $\delta$  7.68 (s, 6H, PPN), 7.59 (s, 12H, PPN), 7.51 (s, 12H, PPN), 3.71 (s, 2H, B-H<sub>t</sub>), -7.96 (s, 2H, B-H<sub>b</sub>) ppm.  $^{11}\text{B}$  NMR (192 MHz, THF)  $\delta$  2.82 (q,  $^1J_{\text{BH}} = 84.5$  Hz) ppm.

Deuterium-substituted complex [18-crown-6-ether][[(NO)<sub>2</sub>Fe( $\eta^2$ -BD<sub>4</sub>)]] (**2-D**) was prepared in a similar manner through the reaction of complex **1**, 18-crown-6-ether, and NaBD<sub>4</sub>.

#### **Preparation of [18-crown-6-ether][[(NO)<sub>2</sub>Fe( $\eta^3$ -HCS<sub>2</sub>)]] (**3**). Method 1.**

Complex **2-Na** (0.125 g, 0.3 mmol) was dissolved in THF (5 mL) before CS<sub>2</sub> (18  $\mu$ L, 0.3 mmol) was added in a dropwise manner to this THF solution. The reaction solution was then stirred under N<sub>2(g)</sub> at ambient temperature for 2 h and monitored with FTIR. Shift of IR  $\nu_{\text{NO}}$  stretching frequencies from 1708 s and 1654 vs cm<sup>-1</sup> to 1717 s and 1648 s cm<sup>-1</sup> was observed. Subsequent addition of diethyl ether to this THF solution led to the precipitation of [Na-18-crown-6-ether][[(NO)<sub>2</sub>Fe( $\eta^3$ -HCS<sub>2</sub>)]] (**3**) (yield: 0.063 g, 43.5 %).

**Method 2.** A 25-mL Schlenk tube was loaded with 18-crown-6-ether (0.264 g, 1.0 mmol) and NaS<sub>2</sub>CH (0.100 g, 1.0 mmol) and the contents in the tube were dissolved in THF (5 mL). The mixture solution was stirred for 1 h and then transferred by cannula under positive N<sub>2</sub> pressure to another 25-mL Schlenk tube loaded with

complex **1** (0.232 g, 1.0 mmol). The reaction solution was stirred for 4 h and then monitored by FTIR spectroscopy, which indicated the formation of [Na-18-crown-6-ether][ $(\text{NO})_2\text{Fe}(\eta^3\text{-HCS}_2)$ ]. The mixture was filtered through Celite to remove the insoluble solid before hexane was added to precipitate the dark-brown solid of [Na-18-crown-6-ether][ $(\text{NO})_2\text{Fe}(\eta^3\text{-HCS}_2)$ ] (**3**) (yield: 0.351 g, 73.2 %). Recrystallization from THF solution of complex **3** layered with hexane at -20 °C for a week led to dark-brown crystals suitable for X-ray crystallography. IR  $\nu_{\text{NO}}$ : 1717 s, 1648 s  $\text{cm}^{-1}$  (THF); 1717 s, 1639 s  $\text{cm}^{-1}$  (KBr).  $^1\text{H}$  NMR (600 MHz, d-THF, 298 K)  $\delta$  7.93 (s, 1H,  $\text{HCS}_2$ ),  $\delta$  3.61 (s, 24H, 18-crown-6-ether).  $^{15}\text{N}$  NMR (61 MHz, d-THF)  $\delta$  74.71 ppm. Absorption spectrum (THF) [ $\lambda_{\text{max}}$ , nm ( $\epsilon$ ,  $\text{M}^{-1}\text{cm}^{-1}$ )]: 334 (4650), 366 (3770), 418 (2150).

**Reaction of Complex 2 and  $\text{CO}_2$ .** To a 5-mL THF solution of complex **2-PPN** (0.067 g, 0.1 mmol), dry  $\text{CO}_2$  was purged for 5 min before this reaction solution was monitored by with FTIR. Disappearance of the IR  $\nu_{\text{NO}}$  stretching frequencies at 1708 and 1654  $\text{cm}^{-1}$  indicated the decomposition of complex **2**. Solvent was then removed under vacuum, whereas the crude solid was extracted with  $\text{CD}_3\text{CN}$ . The singlet  $^1\text{H}$  NMR signal observed at 8.29 ppm as well as the  $^{13}\text{C}$  NMR signal observed at 164.47 ppm indicated the formation of  $[\text{HB}(\text{HCOO})_3]^-$  (yield 66.8% using  $\text{CH}_2\text{Cl}_2$  as an internal standard).

**Conversion of Complex 2 into Complex 1 via Reaction with  $\text{CO}_2$  in the presence of TMEDA.** Dry  $\text{CO}_2$  was purged through a 5-mL THF solution of complex **2** (0.042 g, 0.1 mmol) and TMEDA (1.7  $\mu\text{l}$ , 0.1 mmol) for 5 min. The reaction solution was stirred for an additional 1 h and a significant change in color of the reaction solution from red to deep green was observed. The reaction was then monitored with FTIR. Shift of IR  $\nu_{\text{NO}}$  stretching frequencies from 1708 s and 1654 vs  $\text{cm}^{-1}$  to 1697 s and 1644 s  $\text{cm}^{-1}$  was assigned to the conversion of complex **2** into complex **1**.

**Crystallography.** Dark-brown crystals of complexes [Na-18-crown-6-ether][ $(\text{NO})_2\text{Fe}(\eta^2\text{-BH}_4)$ ] (**2-Na**) and [Na-18-crown-6-ether][ $(\text{NO})_2\text{Fe}(\eta^3\text{-HCS}_2)$ ] (**3**) suitable for single-crystal X-ray diffraction were mounted, respectively, on a glass fiber and quickly coated in epoxy resin. Unit cell parameters were obtained by least-squares refinement. Diffraction measurement for complexes **2-Na** and **3** were carried out on a SMART Apex CCD diffractometer with graphite monochromated Mo  $K_\alpha$  radiation ( $\lambda = 0.71073 \text{ \AA}$ ) and between  $2.52^\circ$  and  $27.47^\circ$  for complex **2-Na**, and between  $2.37^\circ$  and  $24.95^\circ$  for complexes **3**. Least-squares refinement of the positional and anisotropic thermal parameters of all non-hydrogen atoms and fixed hydrogen atoms was based on  $F^2$ . A SADABS absorption correction was made.<sup>5</sup> The SHELXTL structure refinement program was employed.<sup>6</sup> Crystallographic data of DNICs **2-Na** (CCDC 1881645) and **3** (CCDC 1881646) were deposited in Cambridge Crystallographic Data Centre.

**Computational methods.** Geometry optimization of complexes **1**, **2**, and **3**, directly adopted from single-crystal structures, was achieved using Gaussian 09 program with PB86/TZVP and B3LYP/TZVP levels.<sup>7</sup> The geometry-optimized structures with BP86 method are consistent with the single-crystal structures (Table S2), whereas no imaginary frequencies were observed. Extended transition state nature orbital for the chemical valence (ETS-NOCV) analysis<sup>8-13</sup> were performed with BP86/TZVP method using Amsterdam Density Function (ADF) software package<sup>14</sup>. The deformation density plots of all results were plotted with Chimera program.<sup>15</sup>

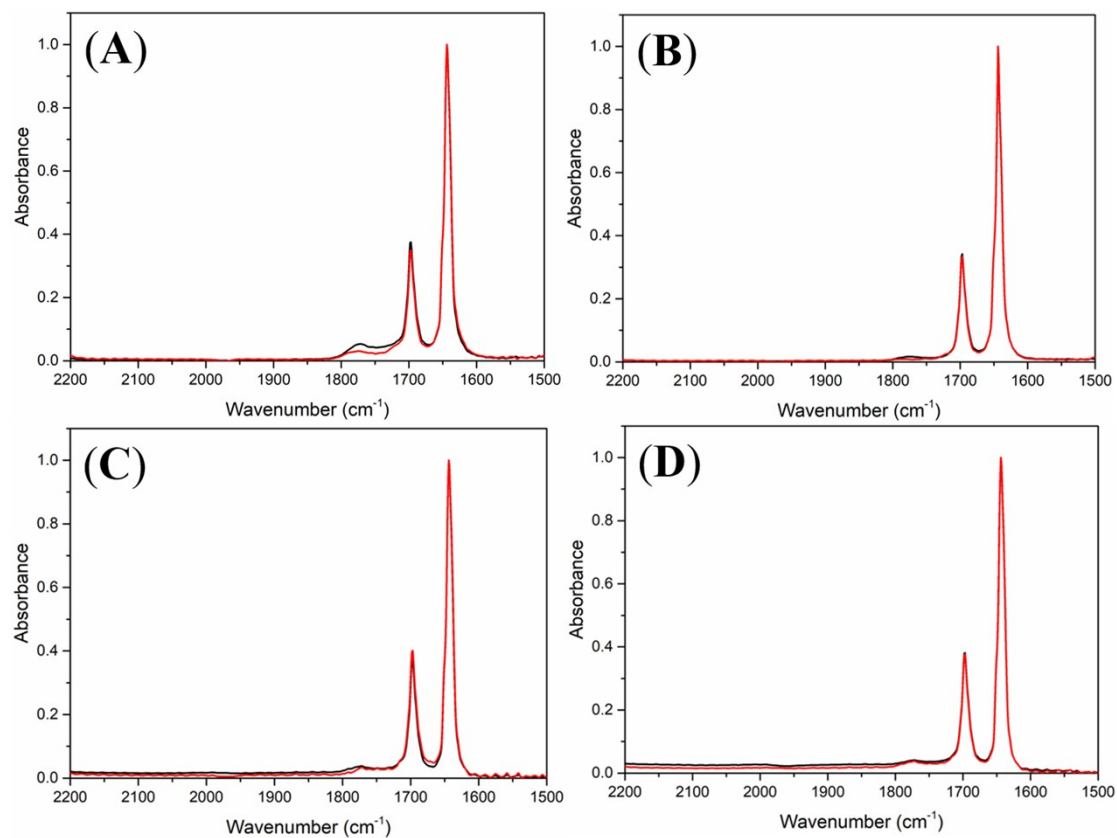

**Figure S1.** IR spectra of DNIC **1** in THF (black) and its reaction with five equiv. of (A)  $\text{NH}_3\text{BH}_3$ , (B)  $\text{BH}_3 \cdot \text{THF}$ , (C) 9-BBN, and (D) HBPin, respectively, for 12 h (red).

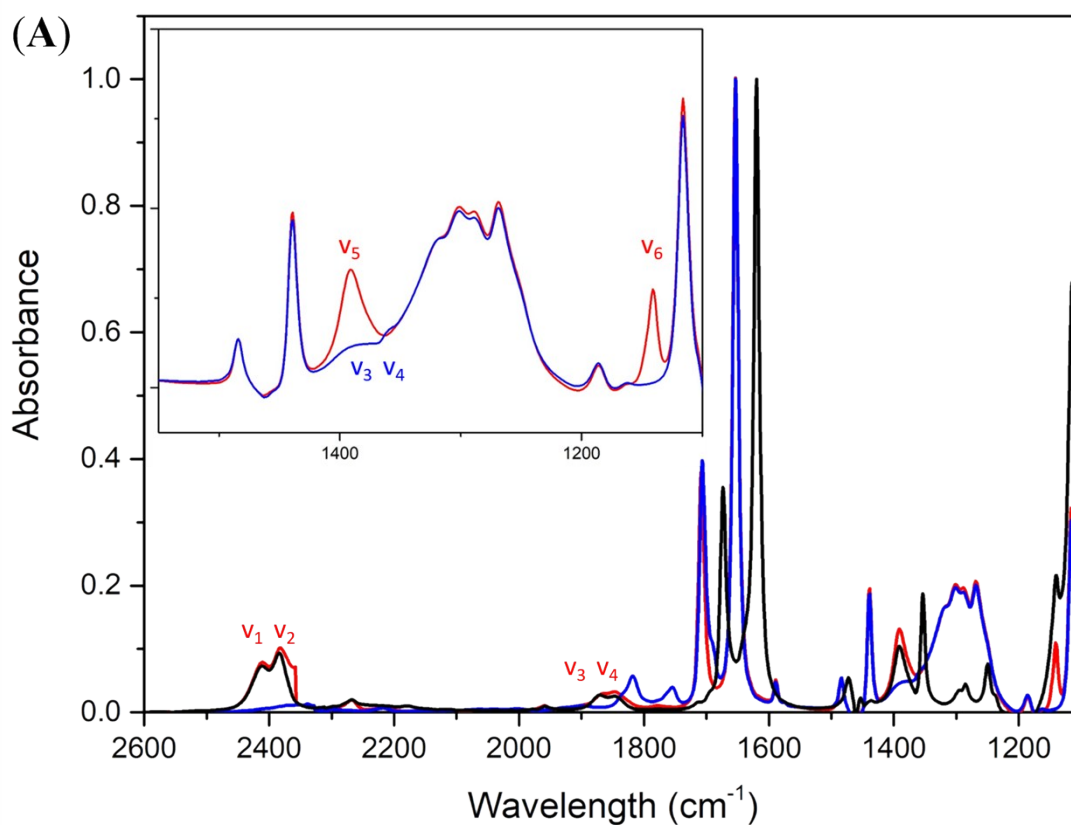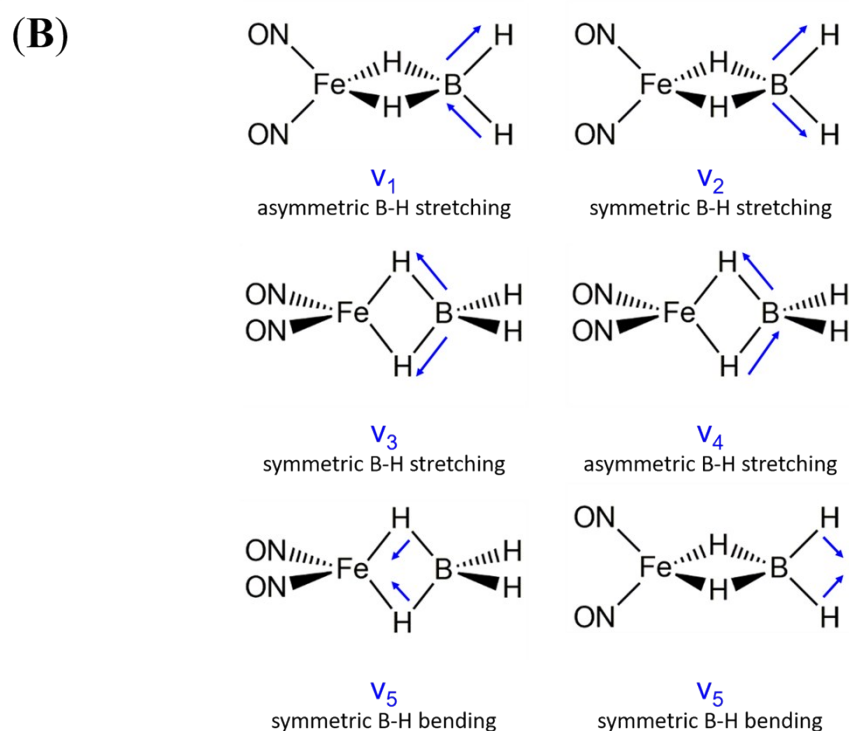

**Figure S2.** (A) IR spectra of DNICs  $[\text{Na-18-crown-6-ether}][(\text{NO})_2\text{Fe}(\eta^2\text{-BH}_4)]$  (**2**) (red),  $[\text{Na-18-crown-6-ether}][(\text{NO})_2\text{Fe}(\eta^2\text{-BD}_4)]$  (**2-D**) (blue), and  $[\text{Na-18-crown-6-ether}][(^{15}\text{NO})_2\text{Fe}(\eta^2\text{-BH}_4)]$  (black) in THF. The comparison of the IR spectra of DNICs **2** (red), **2-D** (blue) in the range between 1100-1550  $\text{cm}^{-1}$  is shown in the inset. (B) Vibrational modes of the  $[\text{BH}_4]^-$  ligand in DNIC **2** identified by isotope-labeling experiment and theoretical calculation.



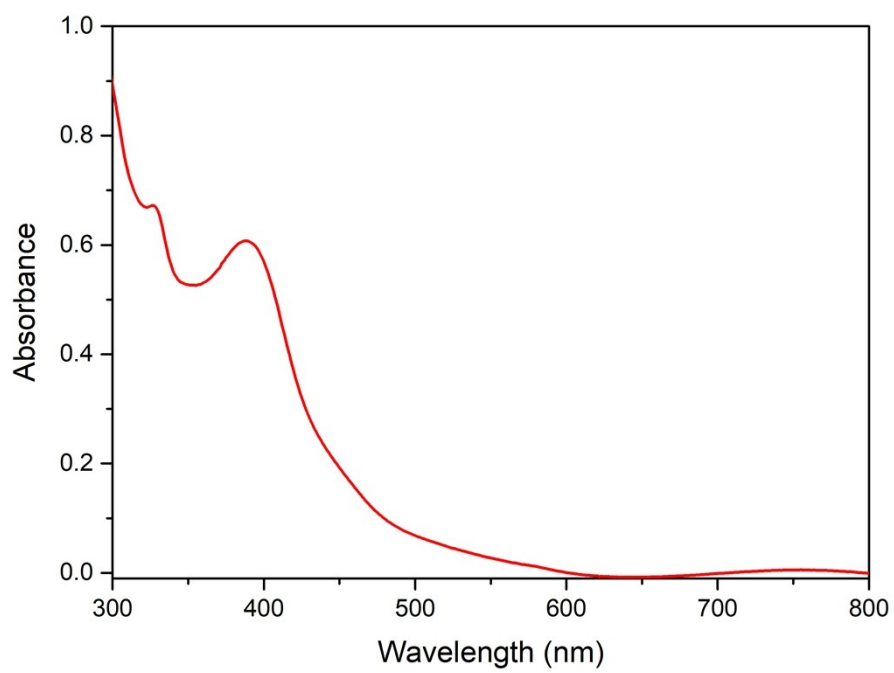

**Figure S3.** UV-vis spectrum DNIC **2** in THF.

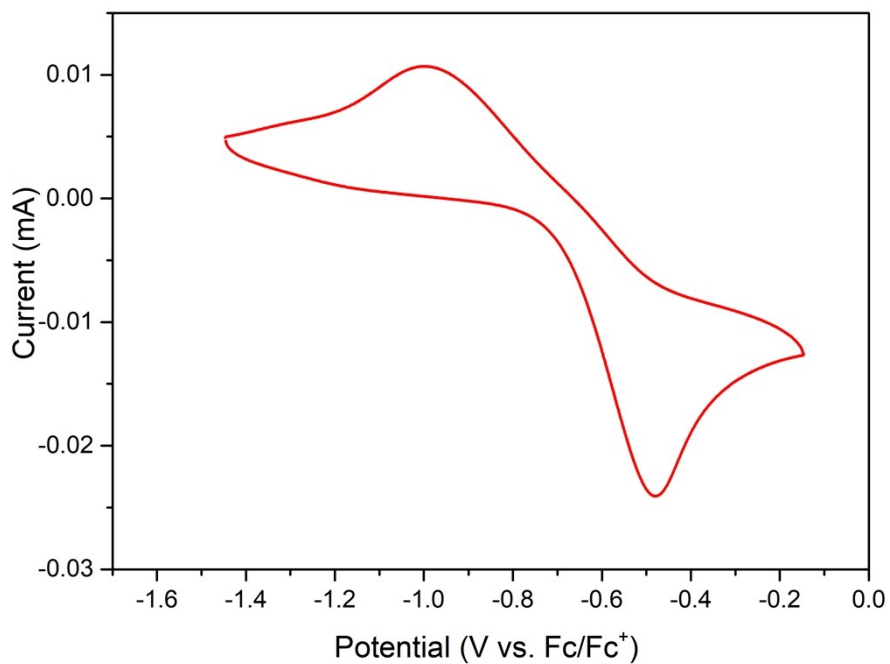

**Figure S4.** Cyclic voltammogram of 2-mM solution of DNIC **2** in THF with 0.1 M of [n-Bu<sub>4</sub>N][PF<sub>6</sub>] electrolyte indicate the oxidation of DNIC **2** at  $E_{pa} = -0.48$  V versus Fc/Fc<sup>+</sup>.

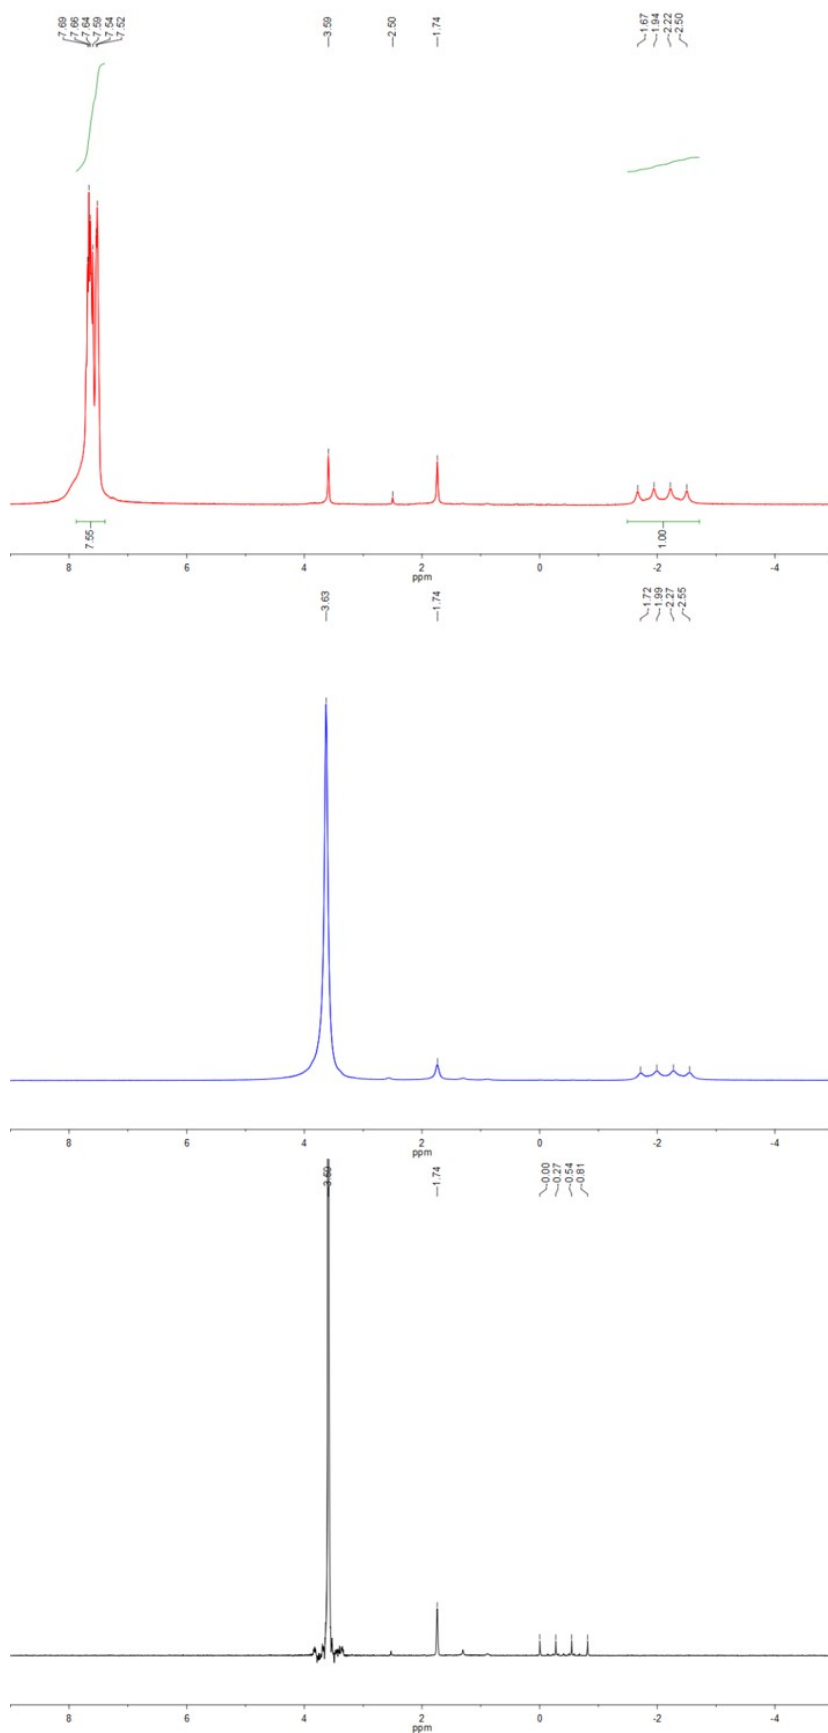

**Figure S5.**  $^1\text{H}$  NMR spectra of DNICs **2-PPN** (red), **2** (blue), and compound  $[\text{Na-18-crown-6-ether}][\text{BH}_4]$  (black) in  $d\text{-THF}$  at 298 K.

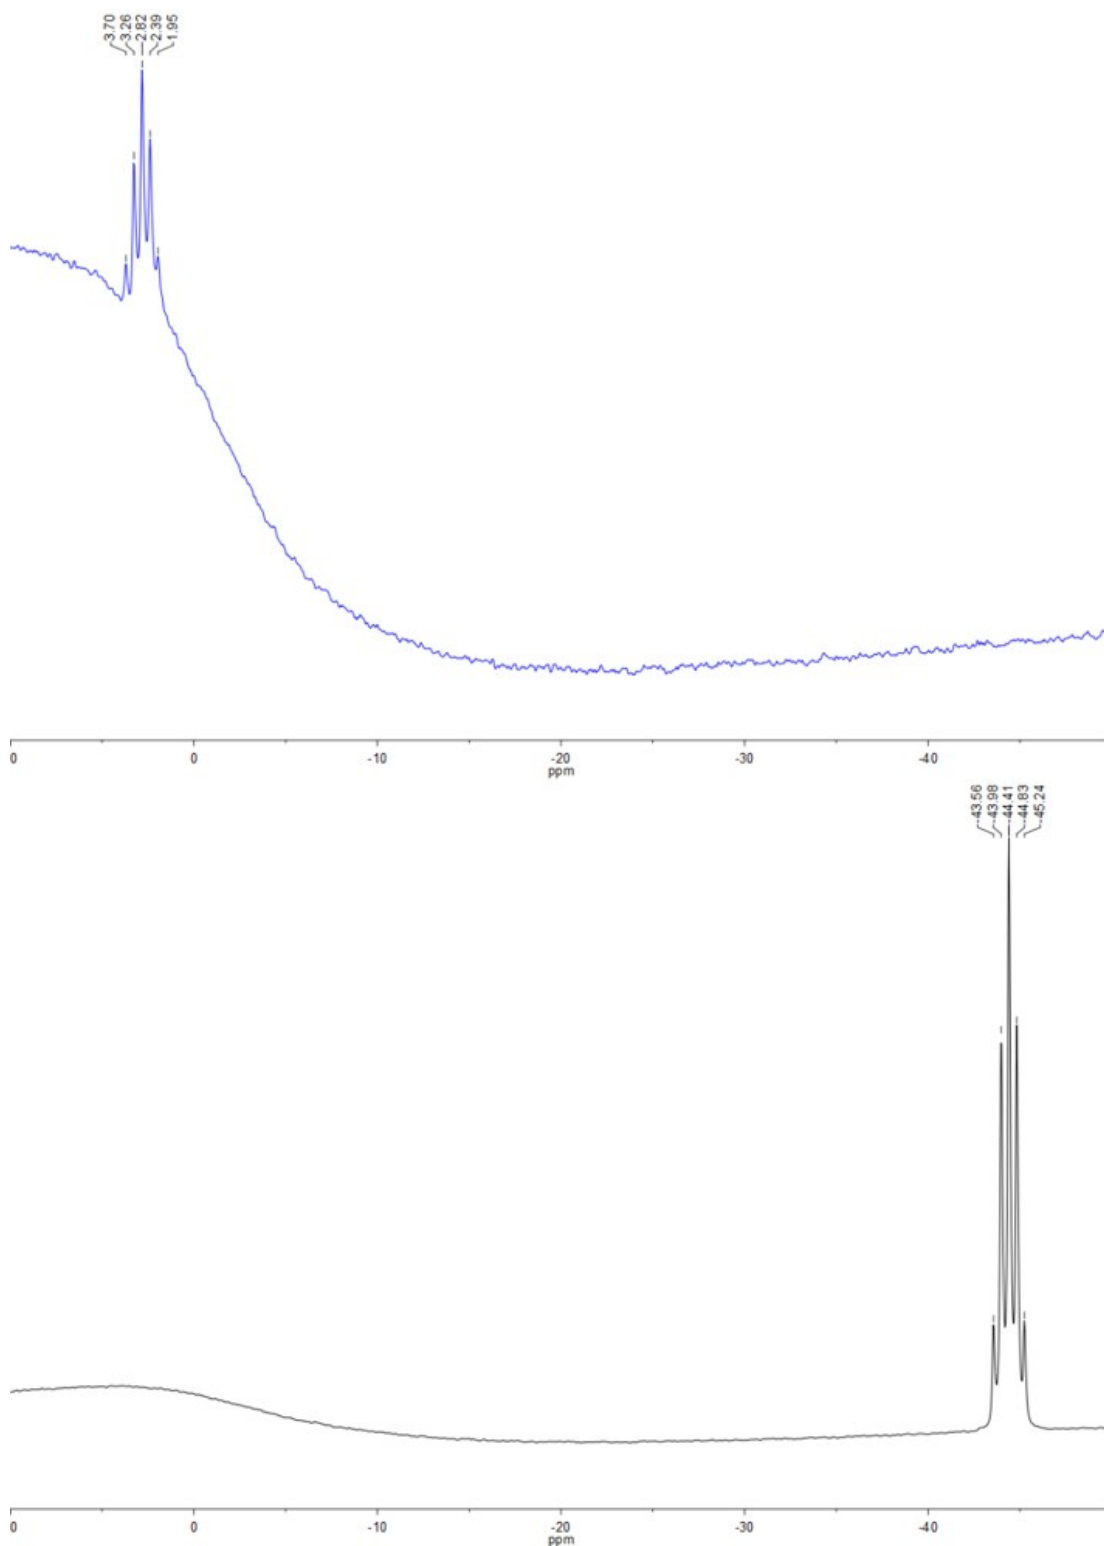

**Figure S6.**  $^{11}\text{B}$  NMR spectra of DNIC **2** (blue) and compound [Na-18-crown-6-ether][ $\text{BH}_4$ ] (black) in d-THF at 298 K.

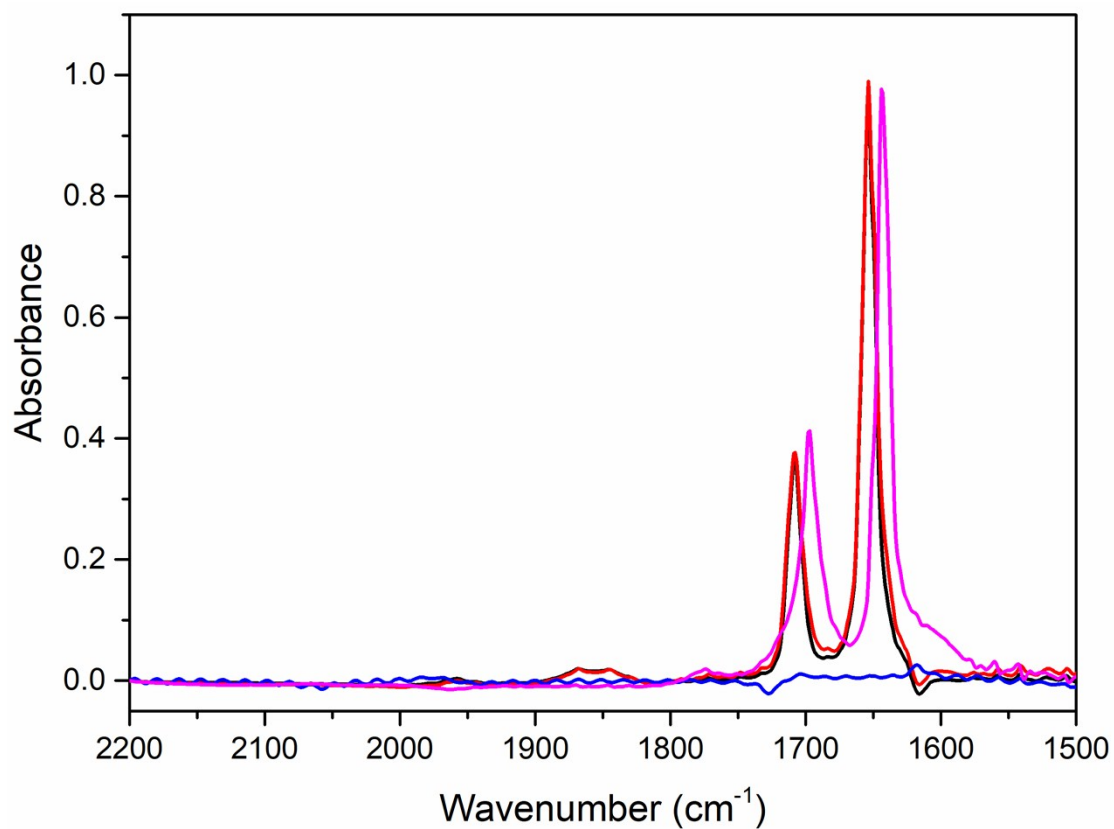

**Figure S7.** IR spectra of DNIC **2** in THF (black), its reaction with five equiv. of TMEDA for 12 h (red), its reaction with CO<sub>2(g)</sub> (blue), and its reaction with CO<sub>2(g)</sub> in the presence of one equiv. of TMEDA (magenta).

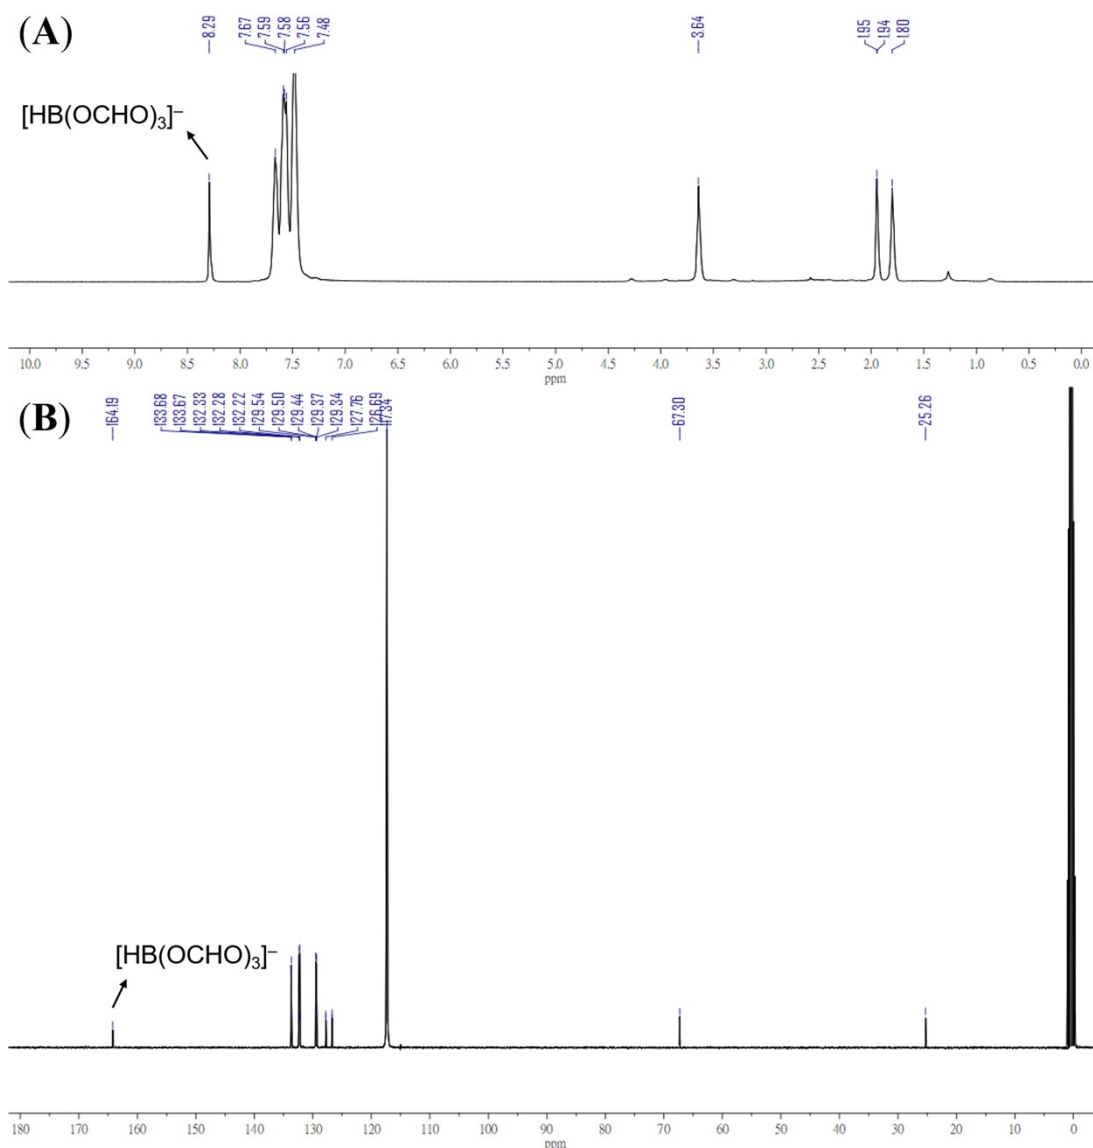

**Figure S8.** (A)  $^1\text{H}$  NMR and (B)  $^{13}\text{C}$  NMR spectra for the  $\text{CD}_3\text{CN}$  solution of complex **2-PPN** purged with  $\text{CO}_2(\text{g})$  for 10 min at 298 K.

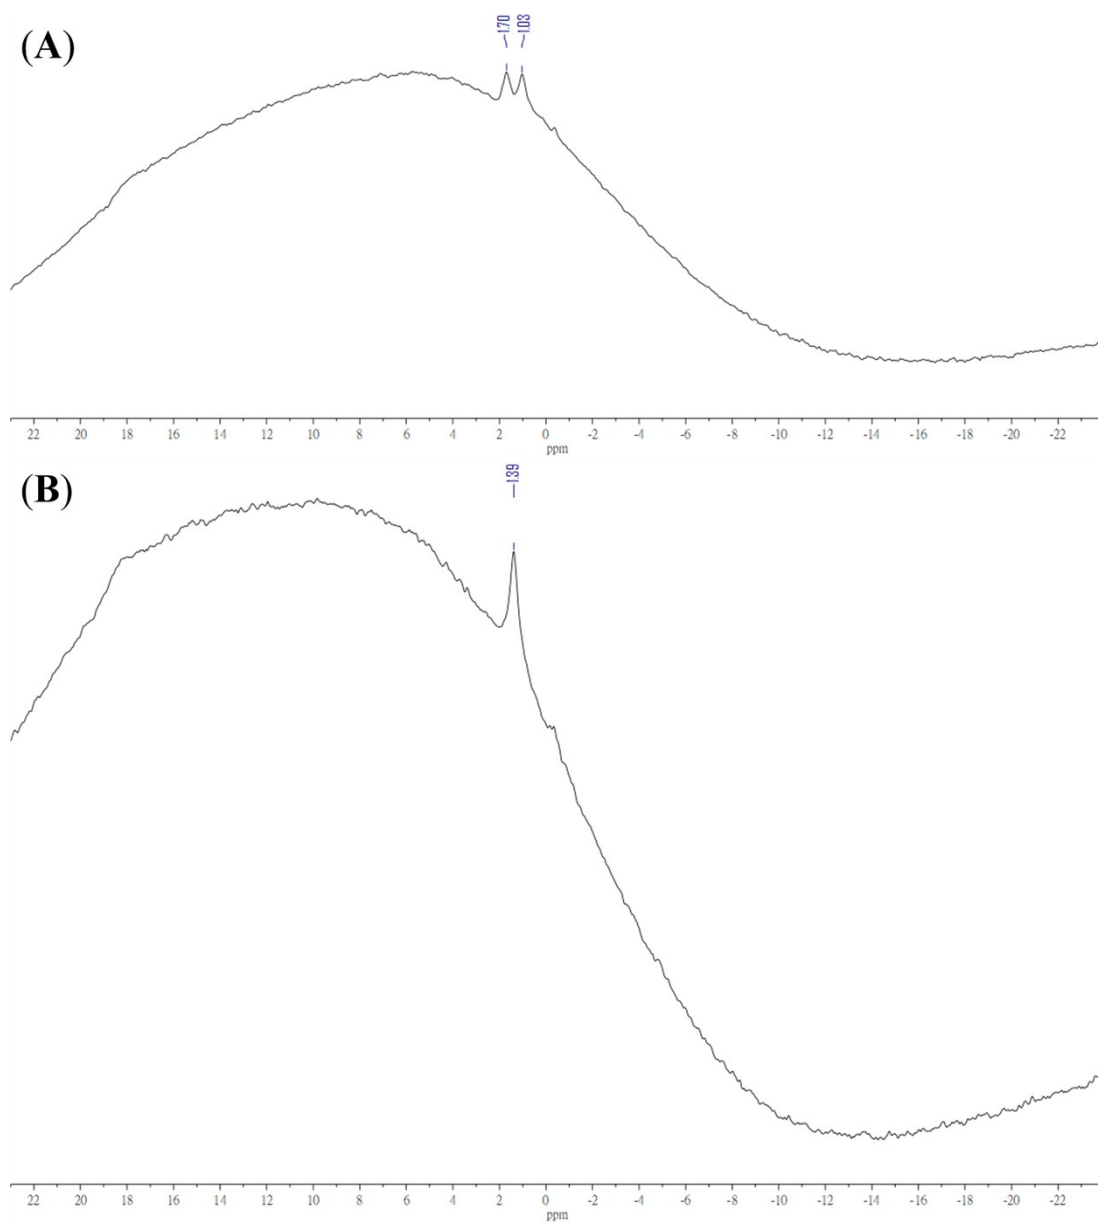

**Figure S9.** (A)  $^{11}\text{B}$  NMR, and (B)  $^{11}\text{B}\{^1\text{H}\}$  NMR spectra for the  $\text{CD}_3\text{CN}$  solution of complex 2-PPN purged with  $\text{CO}_2(\text{g})$  for 10 min at 298 K.

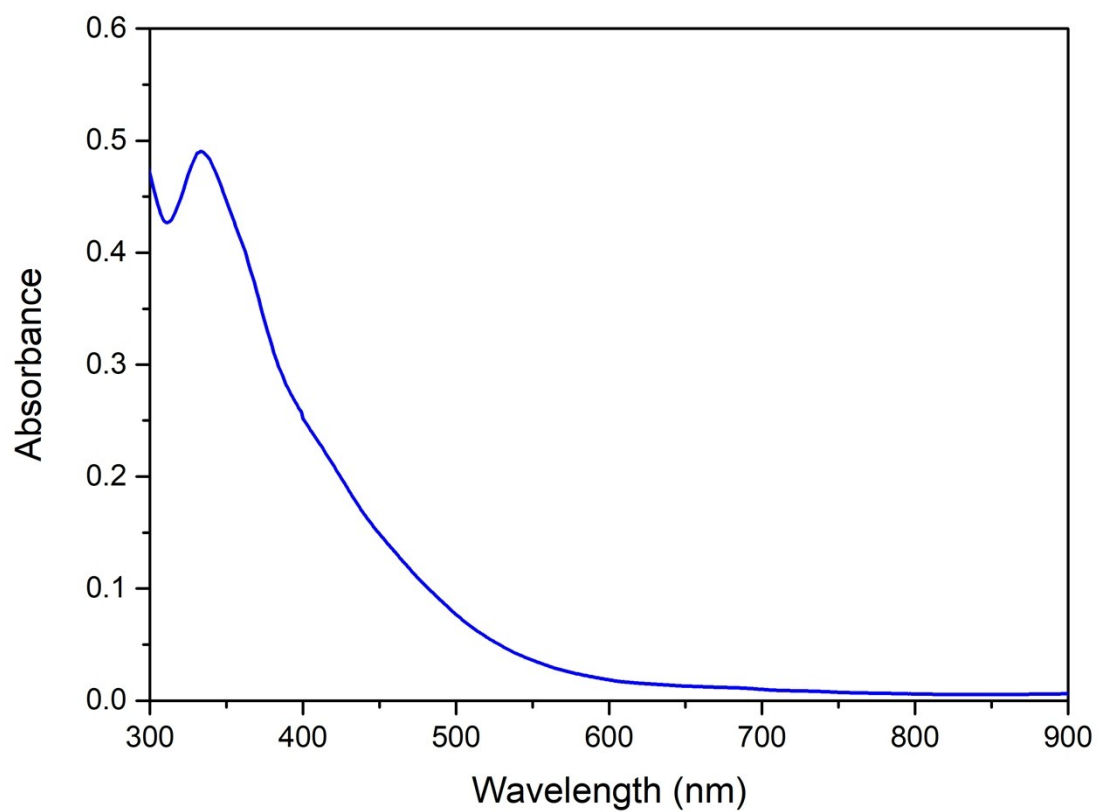

**Figure S10.** UV-vis spectrum DNIC 3 in THF.



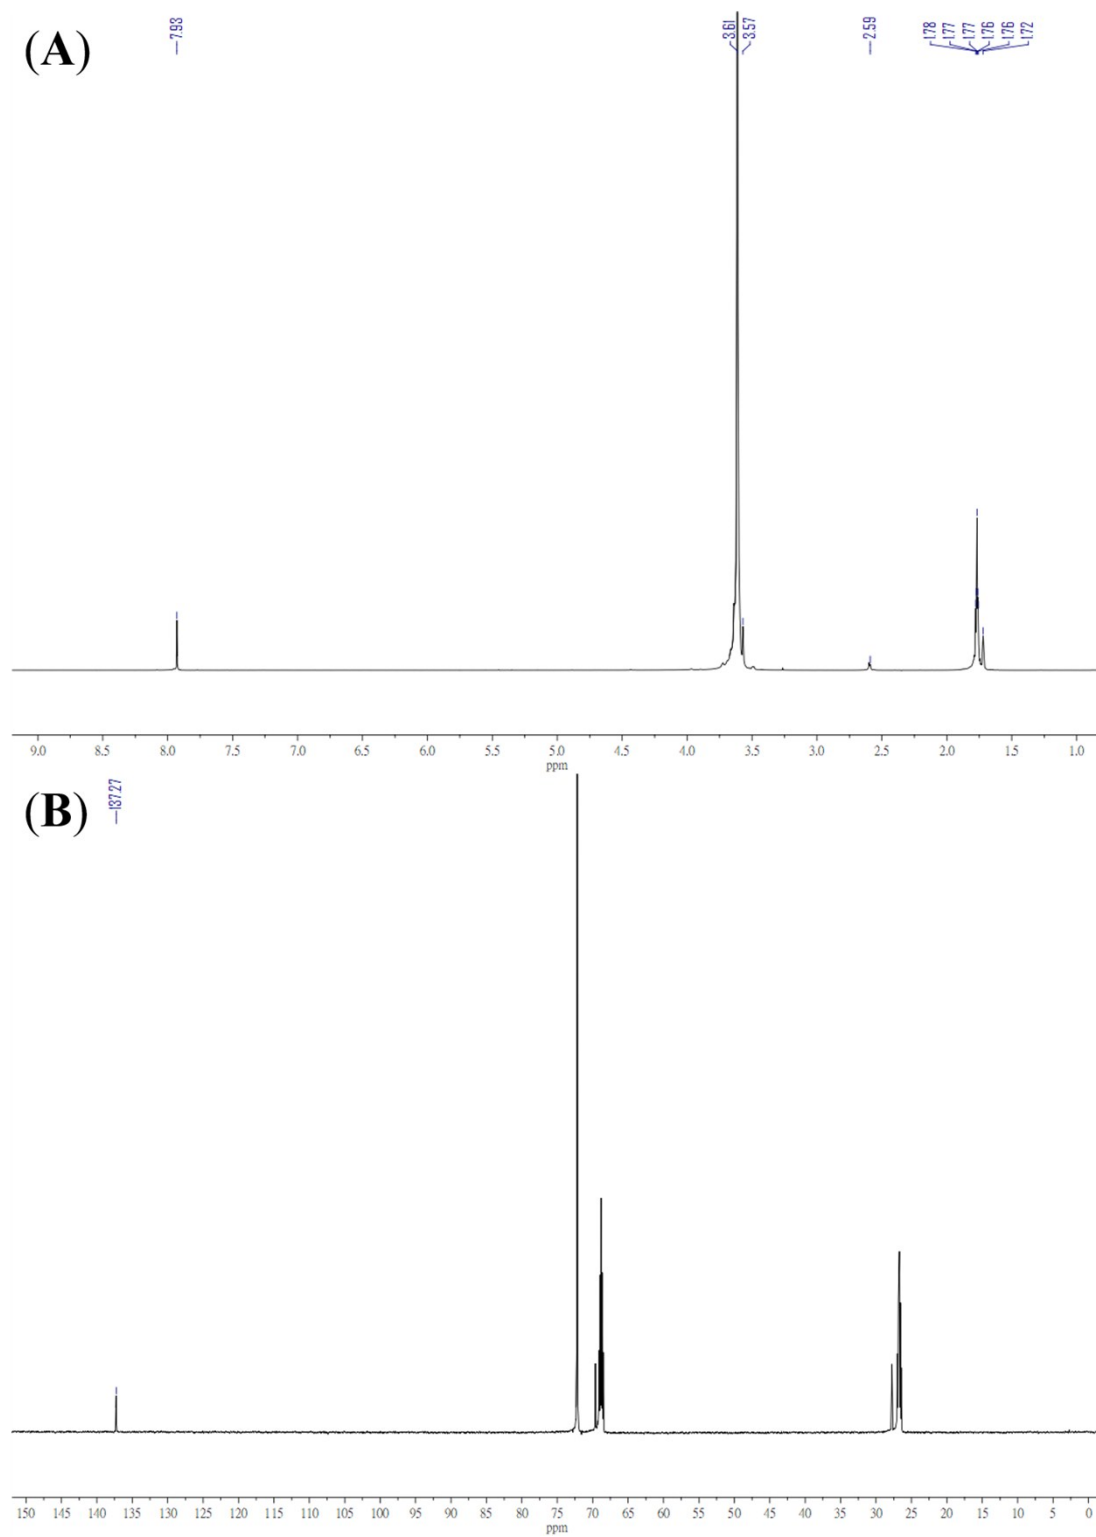

**Table S1.** Experimental and Calculated Vibrational Frequencies for Different Vibrational Modes of the [BH<sub>4</sub>]<sup>-</sup> ligand in DNIC **2**.

| Vibrational Modes                                                | Vibrational Frequency (cm <sup>-1</sup> ) |                |                         |                |
|------------------------------------------------------------------|-------------------------------------------|----------------|-------------------------|----------------|
|                                                                  | Experimental<br>(in THF)                  |                | Calculated <sup>b</sup> |                |
|                                                                  | <sup>1</sup> H                            | <sup>2</sup> D | <sup>1</sup> H          | <sup>2</sup> D |
| <sup>a</sup> asym. B-H <sub>t</sub> stretching (ν <sub>1</sub> ) | 2410                                      | 1818           | 2475                    | 1845           |
| <sup>a</sup> sym. B-H <sub>t</sub> stretching (ν <sub>2</sub> )  | 2382                                      | 1754           | 2443                    | 1799           |
| <sup>a</sup> sym. B-H <sub>b</sub> stretching (ν <sub>3</sub> )  | 1865                                      | 1382           | 1979                    | 1424           |
| <sup>a</sup> asym. B-H <sub>b</sub> stretching (ν <sub>4</sub> ) | 1847                                      | 1358           | 1937                    | 1431           |
| B-H <sub>b</sub> bending (ν <sub>5</sub> )                       | 1391                                      | -              | 1450                    | 1048           |
| B-H <sub>t</sub> bending (ν <sub>6</sub> )                       | 1141                                      | -              | 1179                    | 873            |

<sup>a</sup>asym. = asymmetric; sym. = symmetric. <sup>b</sup>with BP86/TZVP level.

**Table S2.** Selected Bond Distances, Bond Angle, and IR  $\nu_{\text{NO}}$  Stretching Frequencies for DNICs **1**, **2**, and **3** Obtained from Single-crystal Structure and Geometry Optimization.

| <b>Single-Crystal Structures</b> | Fe-NO (Å) | N-O (Å) | $\angle\text{Fe-N-O}$ | Fe-N (Å) | Fe-B (Å) | Fe-C (Å) | Fe-S (Å) | IR $\nu_{\text{NO}}$ (cm <sup>-1</sup> ) |
|----------------------------------|-----------|---------|-----------------------|----------|----------|----------|----------|------------------------------------------|
| <b>1</b>                         | 1.638     | 1.197   | 166.8                 | 2.110    | -        | -        | -        | 1697                                     |
|                                  | 1.639     | 1.188   | 169.8                 | 2.117    | -        | -        | -        | 1644                                     |
| <b>2</b>                         | 1.627     | 1.149   | 170.8                 | -        | 2.194    | -        | -        | 1708                                     |
|                                  | 1.661     | 1.180   | 174.8                 | -        | -        | -        | -        | 1654                                     |
| <b>3</b>                         | 1.677     | 1.189   | 155.1                 | -        | -        | 2.070    | 2.297    | 1717                                     |
|                                  | 1.641     | 1.190   | 177.2                 | -        | -        | -        | 2.294    | 1648                                     |
| <b>BP86/TZVP</b>                 | Fe-NO (Å) | N-O (Å) | $\angle\text{Fe-N-O}$ | Fe-N (Å) | Fe-B (Å) | Fe-C (Å) | Fe-S (Å) | IR $\nu_{\text{NO}}$ (cm <sup>-1</sup> ) |
| <b>1</b>                         | 1.644     | 1.198   | 169.3                 | 2.146    | -        | -        | -        | 1727                                     |
|                                  | 1.644     | 1.198   | 169.3                 | 2.145    | -        | -        | -        | 1678                                     |
| <b>2</b>                         | 1.641     | 1.204   | 168.4                 | -        | 2.159    | -        | -        | 1707                                     |
|                                  | 1.641     | 1.204   | 168.4                 | -        | -        | -        | -        | 1655                                     |
| <b>3</b>                         | 1.673     | 1.204   | 149.7                 | -        | -        | 2.070    | 2.332    | 1732                                     |
|                                  | 1.642     | 1.194   | 176.6                 | -        | -        | -        | 2.332    | 1634                                     |
| <b>B3LYP/TZVP</b>                | Fe-NO (Å) | N-O (Å) | $\angle\text{Fe-N-O}$ | Fe-N (Å) | Fe-B (Å) | Fe-C (Å) | Fe-S (Å) | IR $\nu_{\text{NO}}$ (cm <sup>-1</sup> ) |
| <b>1</b>                         | 1.631     | 1.185   | 170.0                 | 2.160    | -        | -        | -        | 1794                                     |
|                                  | 1.631     | 1.185   | 170.0                 | 2.159    | -        | -        | -        | 1725                                     |
| <b>2</b>                         | 1.625     | 1.190   | 168.1                 | -        | 2.183    | -        | -        | 1773                                     |
|                                  | 1.625     | 1.190   | 168.1                 | -        | -        | -        | -        | 1700                                     |
| <b>3</b>                         | 1.647     | 1.188   | 154.0                 | -        | -        | 2.094    | 2.364    | 1794                                     |
|                                  | 1.624     | 1.180   | 179.8                 | -        | -        | -        | 2.364    | 1701                                     |

**Table S3.** Selected Bond Distances, Bond Angle, and IR  $\nu_{\text{NO}}$  Stretching Frequencies for Neutral  $\{\text{Fe}(\text{NO})_2\}^{10}$  DNICs Containing CO/Carbene Ligands and (Di)Anionic  $\{\text{Fe}(\text{NO})_2\}^{10}$  DNICs.

| Complex                                                                                         | Fe–NO<br>(Å)              | N–O<br>(Å)              | $\angle\text{Fe–N–O}$ | Fe–N<br>(Å)  | Fe–B<br>(Å) | Fe–C<br>(Å)              | Fe–S<br>(Å)                                  | IR $\nu_{\text{NO}}$<br>( $\text{cm}^{-1}$ ) | Ref.         |
|-------------------------------------------------------------------------------------------------|---------------------------|-------------------------|-----------------------|--------------|-------------|--------------------------|----------------------------------------------|----------------------------------------------|--------------|
| <b>1</b>                                                                                        | 1.639                     | 1.193                   | 168.3                 | 2.114        | -           | -                        | -                                            | 1697<br>1644                                 | This<br>work |
| <b>2</b>                                                                                        | 1.644                     | 1.165                   | 172.8                 | -            | 2.194       | -                        | -                                            | 1708<br>1654                                 | This<br>work |
| <b>3</b>                                                                                        | 1.677<br>1.641            | 1.189<br>1.190          | 155.1<br>177.2        | -            | -           | 2.070                    | 2.296                                        | 1717<br>1648                                 | This<br>work |
| <b>Neutral <math>\{\text{Fe}(\text{NO})_2\}^{10}</math> DNICs Containing CO/Carbene Ligands</b> |                           |                         |                       |              |             |                          |                                              |                                              |              |
| Complex                                                                                         | Fe–NO <sup>c</sup><br>(Å) | N–O <sup>d</sup><br>(Å) | $\angle\text{Fe–N–O}$ | Fe–CO<br>(Å) | Fe–P<br>(Å) | Fe–C <sup>e</sup><br>(Å) | IR $\nu_{\text{NO}}$<br>( $\text{cm}^{-1}$ ) | Ref.                                         |              |
| $[\text{Fe}_2(\mu\text{-L}_1)(\text{NO})_4(\text{CO})_2]^a$                                     | 1.682                     | 1.173                   | 176.2                 | 1.763        | 2.262       | -                        | 1760<br>1702                                 | 16                                           |              |
| $[\text{Fe}_2(\mu\text{-L}_2)(\text{NO})_4(\text{CO})_2]^a$                                     | 1.707                     | 1.166                   | 177.0                 | 1.778        | 2.270       | -                        | 1767<br>1716                                 | 16                                           |              |
| $[(\text{IMes})(\text{CO})\text{Fe}(\text{NO})_2]^a$                                            | 1.676                     | 1.174                   | 175.2                 | 1.777        | -           | 1.989                    | 1744<br>1702                                 | 17                                           |              |
| $[(\text{NHC-Me})(\text{CO})\text{Fe}(\text{NO})_2]^a$                                          | 1.727                     | 1.176                   | 173.2                 | 1.729        | -           | 2.025                    | 1740<br>1697                                 | 18                                           |              |
| $[(\text{NHC-iPr})(\text{CO})\text{Fe}(\text{NO})_2]^a$                                         | 1.676                     | 1.181                   | 175.8                 | 1.784        | -           | 2.005                    | 1738<br>1696                                 | 18                                           |              |
| $[(\text{MeMes-NHC})(\text{CO})\text{Fe}(\text{NO})_2]^a$                                       | 1.661                     | 1.179                   | 174.8                 | 1.834        | -           | 1.990                    | 1743<br>1690                                 | 19                                           |              |
| $[(\text{sIMes})(\text{CO})\text{Fe}(\text{NO})_2]^a$                                           | 1.683                     | 1.169                   | 172.6                 | 1.771        | -           | 1.998                    | 1747<br>1705                                 | 20                                           |              |
| $[(\text{MeMes-NHC})_2\text{Fe}(\text{NO})_2]^a$                                                | 1.651                     | 1.204                   | 172.2                 | -            | -           | 1.989                    | 1675<br>1634                                 | 19                                           |              |
| $[(\text{NHC-Me})_2\text{Fe}(\text{NO})_2]^a$                                                   | 1.660                     | 1.202                   | 174.0                 | -            | -           | 1.973                    | 1667<br>1624                                 | 18                                           |              |
| $[(\text{NHC-iPr})_2\text{Fe}(\text{NO})_2]^a$                                                  | 1.643                     | 1.204                   | 173.8                 | -            | -           | 2.015                    | 1664<br>1619                                 | 18                                           |              |
| <b>(Di)Anionic <math>\{\text{Fe}(\text{NO})_2\}^{10}</math> DNICs</b>                           |                           |                         |                       |              |             |                          |                                              |                                              |              |
|                                                                                                 | Fe–NO <sup>c</sup><br>(Å) | N–O <sup>d</sup><br>(Å) | $\angle\text{Fe–N–O}$ | Fe–N<br>(Å)  | Fe–O<br>(Å) | Fe–P<br>(Å)              | Fe–S <sup>f</sup><br>(Å)                     | IR $\nu_{\text{NO}}$<br>( $\text{cm}^{-1}$ ) | Ref.         |
| $[(\text{NO})_2(\text{PPh}_3)\text{Fe}(\text{NO})_2]^-$                                         | 1.657                     | 1.206                   | 171.9                 | 2.025        | -           | 2.248                    | -                                            | 1693<br>1642                                 | 21           |
| $[(\text{NO})_2\text{Fe}(\text{NC}_9\text{H}_6\text{-NH})]^-^b$                                 | 1.622                     | 1.183                   | 168.8                 | 2.048        | -           | -                        | -                                            | 1655<br>1603                                 | 22           |
| $[(\text{NO})_2\text{Fe}(\text{NC}_9\text{H}_6\text{-O})]^-^b$                                  | 1.620                     | 1.231                   | 169.7                 | 2.045        | 2.021       | -                        | -                                            | 1674<br>1619                                 | 22           |
| $[(\text{NO})_2\text{Fe}(\text{NC}_9\text{H}_6\text{-S})]^-^b$                                  | 1.652                     | 1.209                   | 170.2                 | 2.067        | -           | -                        | 2.316                                        | 1660<br>1612                                 | 22           |
| $[(\text{NO})_2\text{Fe}(\text{SC}_6\text{H}_4\text{-}o\text{-NH}_2)]^-^b$                      | 1.647                     | 1.200                   | 168.6                 | 2.085        | -           | -                        | 2.327                                        | 1657<br>1607                                 | 22           |
| $[(\text{NO})_2\text{Fe}(\text{SC}_2\text{H}_5)]^{2-}^b$                                        | 1.642                     | 1.205                   | 167.8                 | -            | -           | -                        | 2.324                                        | 1614<br>1571                                 | 23           |
| $[(\text{NO})_2\text{Fe}(\text{S}(\text{CH}_2)_3\text{S})]^{2-}^b$                              | 1.650                     | 1.217                   | 168.7                 | -            | -           | -                        | 2.331                                        | 1600<br>1552                                 | 13           |
| $[(\text{NO})_2\text{Fe}(\text{S}(\text{CH}_2)_2\text{S})]^{2-}^b$                              | 1.650                     | 1.218                   | 167.4                 | -            | -           | -                        | 2.329                                        | 1600<br>1559                                 | 13           |

<sup>a</sup> $\text{L}_1$  = bis(diphenylphosphino)methane (dppm);  $\text{L}_2$  = bis(diphenylphosphino)acetylene (dppa); IMes = 1,3-bis(2,4,6-trimethylphenyl)imidazol-2-ylidene; NHC-Me = 1,3-dimethylimidazol-2-ylidene; NHC-iPr = 1,3-diisopropylimidazol-2-ylidene; MeMes-NHC = 1-methyl-3-(2,4,6-trimethylphenyl)imidazol-2-ylidene; sIMes = 1,3-bis(2,4,6-trimethylphenyl)imidazol-2-ylidene. <sup>b</sup>The counteraction is [K-18-crown-6-ether]. <sup>c</sup>The average Fe–NO bond distance of neutral  $\{\text{Fe}(\text{NO})_2\}^{10}$  DNICs lies in the range of 1.638–1.727 Å, whereas that of (di)anionic  $\{\text{Fe}(\text{NO})_2\}^{10}$  DNICs lies in the range of 1.620–1.657 Å. <sup>24</sup> <sup>d</sup>The average N–O bond distance of  $\{\text{Fe}(\text{NO})_2\}^{10}$  DNICs without  $\pi$ -acceptor CO ligands lies in the range of 1.183–1.231 Å. <sup>e</sup>The average Fe–C(carbene) bond distance of neutral  $\{\text{Fe}(\text{NO})_2\}^{10}$  DNICs lies in the range of 1.973–2.025 Å. <sup>f</sup>The average Fe–S bond distance of (di)anionic  $\{\text{Fe}(\text{NO})_2\}^{10}$  DNICs lies in the range of 2.316–2.331 Å.

**Table S4.** Selected Bond Distances, Bond Angle, and  $^1\text{H}/^{13}\text{C}$  NMR Signals for  $[\text{Fe}(\eta^2\text{-HCS}_2)]$  and  $[\text{M}-(\eta^3\text{-HCS}_2)]$  Complexes.<sup>a</sup>

| Complex                                                                              | M-S<br>(Å)     | M-C <sup>c</sup><br>(Å) | C-S<br>(Å)     | $\angle\text{S-C-S}$ | $^1\text{H}$ NMR<br>(ppm) | $^{13}\text{C}$ NMR<br>(ppm) | Ref.         |
|--------------------------------------------------------------------------------------|----------------|-------------------------|----------------|----------------------|---------------------------|------------------------------|--------------|
| <b>3</b>                                                                             | 2.294<br>2.297 | 2.070                   | 1.716<br>1.699 | 123.6                | 7.93                      | 137.3                        | This<br>work |
| $[(\text{L}_1)\text{Fe}(\eta^2\text{-HCS}_2)(\text{PMe}_3)_2]^b$                     | 2.355<br>2.314 | 2.764                   | 1.666<br>1.657 | 114.74               | 11.67                     | -                            | 25           |
| $[(\text{L}_2)\text{Fe}(\eta^2\text{-HCS}_2)(\text{PMe}_3)_2]^b$                     | 2.356<br>2.310 | 2.689                   | 1.675<br>1.624 | 118.75               | 11.52                     | 205.6                        | 25           |
| $[(\text{depe})_2\text{Fe}(\eta^2\text{-S}_2\text{CH})]^{+b}$                        | 2.326<br>2.312 | 2.830                   | 1.691<br>1.662 | 110.0                | -                         | -                            | 26           |
| $[(\text{dppm})_2\text{Fe}(\eta^2\text{-S}_2\text{CH})]^{+b}$                        | 2.303<br>2.318 | 2.760                   | 1.661<br>1.657 | 113.4                | -                         | -                            | 27           |
| $[\text{Mn}_2(\text{CO})_6(\mu\text{-S}_2\text{CH})]^-$                              | 2.359<br>2.318 | 2.015                   | 1.717<br>1.718 | 107.1                | 6.07                      | 99.8                         | 28           |
| $[(\text{Cp}^*)\text{Mo}(\eta^2\text{-S}_2\text{CH}_2)(\eta^3\text{-S}_2\text{CH})]$ | 2.402<br>2.391 | 2.223                   | 1.720<br>1.719 | 121.8                | 5.90                      | 67.8                         | 29           |
| $[(\text{Cp}^*)\text{W}(\eta^2\text{-S}_2\text{CH}_2)(\eta^3\text{-S}_2\text{CH})]$  | 2.394<br>2.384 | 2.200                   | 1.726<br>1.726 | 121.4                | 5.30                      | 61.4                         | 29           |

<sup>a</sup>All the crystallographically-characterized  $[\text{Fe}(\eta^2\text{-HCS}_2)]$  and  $[\text{M}-(\eta^3\text{-HCS}_2)]$  complexes available on CCDC are included. <sup>b</sup> $\text{L}_1 = 2,6\text{-F}_2\text{C}_6\text{H}_3\text{-C(=NH)-C}_6\text{H}_3\text{-4-Cl}$ ,  $\text{L}_2 = \text{C}_6\text{H}_5\text{-C(=NH)-C}_6\text{H}_3\text{-4-OMe}$ ,  $\text{depe} = \text{bis}(\text{diethylphosphino})\text{ethane}$ ,  $\text{dppm} = \text{bis}(\text{diphenylphosphino})\text{methane}$ . <sup>c</sup>The average Fe-C bond distance of  $[\text{Fe}(\eta^2\text{-HCS}_2)]$  complex lies in the range of 2.689-2.830 Å, whereas that of  $[\text{M}-(\eta^3\text{-HCS}_2)]$  complex lies in the range of 2.015-2.223 Å.

**Table S5.** Coordinates of Geometry-Optimized DNIC **1** with B3LYP/TZVP level.

---

|    |             |             |             |
|----|-------------|-------------|-------------|
| Fe | 0.70958300  | 0.03066400  | -0.00096600 |
| O  | 2.36893400  | 0.14952400  | 2.25839400  |
| O  | 2.37703900  | 0.01160500  | -2.25725700 |
| N  | 1.57600300  | 0.10098000  | 1.37952300  |
| N  | 1.58053900  | 0.01810700  | -1.38032200 |
| N  | -0.96017400 | 1.40033600  | -0.03022500 |
| N  | -0.84546600 | -1.46669000 | 0.02985300  |
| C  | -2.15917400 | 0.58793800  | -0.34319300 |
| C  | -2.09748500 | -0.75286000 | 0.37049700  |
| C  | -1.10208700 | 2.06260600  | 1.28493400  |
| C  | -0.75910000 | 2.43888700  | -1.06235400 |
| C  | -0.54878000 | -2.49783400 | 1.04621200  |
| C  | -0.95422000 | -2.12341200 | -1.29084900 |
| H  | -3.08160000 | 1.11939600  | -0.07154600 |
| H  | -2.18288200 | 0.43541000  | -1.42239300 |
| H  | -2.98103700 | -1.35598100 | 0.11949400  |
| H  | -2.10782500 | -0.60100500 | 1.44994900  |
| H  | -1.94821100 | 2.76407300  | 1.28003200  |
| H  | -0.18599400 | 2.60350000  | 1.51049800  |
| H  | -1.25409800 | 1.32498800  | 2.06928300  |
| H  | -1.61462100 | 3.12730500  | -1.10523200 |
| H  | -0.62113400 | 1.96723200  | -2.03280800 |
| H  | 0.14120700  | 3.00265200  | -0.82775900 |
| H  | -1.34562400 | -3.25346700 | 1.08989200  |
| H  | -0.43786300 | -2.02887300 | 2.02134900  |
| H  | 0.39114300  | -2.98420400 | 0.79455700  |
| H  | -1.74044200 | -2.89133900 | -1.28234100 |
| H  | -0.00056900 | -2.58465100 | -1.53642300 |
| H  | -1.17862700 | -1.39243000 | -2.06383500 |

---

**Table S6.** Coordinates of Geometry-Optimized DNIC **1** with BP86/TZVP level.

---

|    |             |             |             |
|----|-------------|-------------|-------------|
| Fe | 0.69836300  | -0.04137400 | 0.00121700  |
| O  | 2.40127300  | -0.05888000 | 2.26175000  |
| O  | 2.39567400  | -0.15302900 | -2.26087600 |
| N  | 1.58138700  | -0.05260800 | 1.38796400  |
| N  | 1.57773000  | -0.10615400 | -1.38648500 |
| N  | -0.82528600 | 1.46762100  | -0.02187500 |
| N  | -0.97855300 | -1.37960600 | 0.02178400  |
| C  | -2.09920200 | 0.78343700  | -0.37685900 |
| C  | -2.18393800 | -0.56103100 | 0.33381500  |
| C  | -0.93049100 | 2.11236300  | 1.31168600  |
| C  | -0.50963200 | 2.51296400  | -1.02634000 |
| C  | -0.79534700 | -2.43262000 | 1.05113500  |
| C  | -1.12320700 | -2.03598500 | -1.30303600 |
| H  | -2.97935100 | 1.40950900  | -0.12692200 |
| H  | -2.10198300 | 0.63592900  | -1.46693600 |
| H  | -3.11634100 | -1.09039100 | 0.05282300  |
| H  | -2.20958100 | -0.41232300 | 1.42351900  |
| H  | -1.70814700 | 2.90261200  | 1.30767500  |
| H  | 0.04097300  | 2.55080300  | 1.56816000  |
| H  | -1.17494700 | 1.36731400  | 2.07806300  |
| H  | -1.30240700 | 3.28730000  | -1.06149600 |
| H  | -0.40075100 | 2.04828200  | -2.01373500 |
| H  | 0.44569700  | 2.98151700  | -0.76116600 |
| H  | -1.66705300 | -3.11679000 | 1.08428600  |
| H  | -0.65413500 | -1.96175700 | 2.03164400  |
| H  | 0.10851500  | -3.00624900 | 0.81310100  |
| H  | -1.98287900 | -2.73624300 | -1.30394300 |
| H  | -0.20094700 | -2.58451700 | -1.52802600 |
| H  | -1.26571800 | -1.28354800 | -2.08782500 |

---

**Table S7.** Coordinates of Geometry-Optimized DNIC **2** with B3LYP/TZVP level.

|    |             |             |             |
|----|-------------|-------------|-------------|
| Fe | -0.00002000 | 0.31134600  | 0.00003900  |
| N  | 1.36887300  | -0.56476400 | 0.00002400  |
| N  | -1.36876100 | -0.56498500 | -0.00002600 |
| O  | 2.21743000  | -1.39931700 | -0.00004100 |
| O  | -2.21723700 | -1.39962200 | -0.00003000 |
| B  | -0.00026800 | 2.49458400  | -0.00000100 |
| H  | -0.00018200 | 1.71432100  | 1.02431700  |
| H  | 0.00062000  | 1.71398100  | -1.02424700 |
| H  | 1.01433900  | 3.15210200  | 0.00001300  |
| H  | -1.01525300 | 3.15142500  | -0.00051700 |

**Table S8.** Coordinates of Geometry-Optimized DNIC **2** with BP86/TZVP level.

|    |             |             |             |
|----|-------------|-------------|-------------|
| Fe | -0.00000100 | 0.31487300  | 0.00000200  |
| N  | 1.38693600  | -0.56135900 | 0.00009300  |
| N  | -1.38692600 | -0.56137600 | -0.00014500 |
| O  | -2.25372300 | -1.39649400 | -0.00020100 |
| O  | 2.25373300  | -1.39647700 | 0.00012200  |
| B  | -0.00001400 | 2.47379100  | 0.00010500  |
| H  | 0.00008000  | 1.68732600  | -1.04227600 |
| H  | -0.00010700 | 1.68721900  | 1.04241000  |
| H  | -1.02315200 | 3.13635100  | 0.00004700  |
| H  | 1.02311900  | 3.13635600  | 0.00023800  |



**Table S9.** Coordinates of Geometry-Optimized DNIC **3** with B3LYP/TZVP level.

|    |             |             |             |
|----|-------------|-------------|-------------|
| Fe | 0.32418800  | -0.02655800 | -0.00009000 |
| N  | 1.19872700  | -1.42251700 | 0.00032600  |
| N  | 1.27365200  | 1.29152100  | -0.00043100 |
| O  | 2.20618600  | -2.05139600 | 0.00039600  |
| O  | 1.96095100  | 2.25102000  | -0.00053400 |
| C  | -1.68734400 | -0.60994400 | 0.00034400  |
| S  | -1.46976900 | 0.16638700  | -1.52739000 |
| S  | -1.46935200 | 0.16742800  | 1.52747600  |
| H  | -1.92262700 | -1.67089300 | 0.00073900  |

**Table S10.** Coordinates of Geometry-Optimized DNIC **3** with BP86/TZVP level.

|    |             |             |             |
|----|-------------|-------------|-------------|
| Fe | 0.29863200  | -0.03759200 | -0.00005000 |
| N  | 1.19662000  | -1.44881700 | 0.00013700  |
| N  | 1.25426100  | 1.29766300  | -0.00041500 |
| O  | 2.26760400  | -1.99917900 | 0.00041800  |
| O  | 1.88973400  | 2.30870500  | -0.00050800 |
| C  | -1.68540100 | -0.62664700 | 0.00033100  |
| S  | -1.44163700 | 0.15605100  | -1.53992200 |
| S  | -1.44121900 | 0.15717100  | 1.53999500  |
| H  | -1.94121300 | -1.69241100 | 0.00080700  |

## Reference

1. R. Wedmann, A. Zahl, T. E. Shubina, M. Durr, F. W. Heinemann, B. E. Bugenhagen, P. Burger, I. Ivanovic-Burmazovic and M. R. Filipovic, *Inorg. Chem.*, 2015, **54**, 9367-9380.
2. R. E. Stevens and W. L. Gladfelter, *Inorg. Chem.*, 1983, **22**, 2034-2042.
3. M.-C. Hung, M.-C. Tsai, G.-H. Lee and W.-F. Liaw, *Inorg. Chem.*, 2006, **45**, 6041-6047.
4. S. J. Schauer, D. P. Eyman, R. J. Bernhardt, M. A. Wolff and L. M. Mallis, *Inorg. Chem.*, 1991, **30**, 570-572.
5. G. M. Sheldrick and SADABS, *University of Gottingen: Gottingen, Germany*, 1996.
6. G. M. Sheldrick and SHELXTL, *Siemens Analytical X-ray Instruments Inc.: Madison, WI*, 1994.
7. M. J. Frisch, G. W. Trucks, H. B. Schlegel, G. E. Scuseria, J. R. C. M. A. Robb, G. Scalmani, V. Barone, B. Mennucci, G. A. Petersson, H. Nakatsuji, M. Caricato, X. Li, H. P. Hratchian, A. F. Izmaylov, J. Bloino, G. Zheng, J. L. Sonnenberg, M. Hada, M. Ehara, K. Toyota, R. Fukuda, J. Hasegawa, M. Ishida, T. Nakajima, Y. Honda, O. Kitao, H. Nakai, T. Vreven, J. A. Montgomery, Jr., J. E. Peralta, F. Ogliaro, M. Bearpark, J. J. Heyd, E. Brothers, K. N. Kudin, V. N. Staroverov, R. Kobayashi, J. Normand, K. Raghavachari, A. Rendell, J. C. Burant, S. S. Iyengar, J. Tomasi, M. Cossi, N. Rega, J. M. Millam, M. Klene, J. E. Knox, J. B. Cross, V. Bakken, C. Adamo, J. Jaramillo, R. Gomperts, R. E. Stratmann, O. Yazyev, A. J. Austin, R. Cammi, C. Pomelli, J. W. Ochterski, R. L. Martin, K. Morokuma, V. G. Zakrzewski, G. A. Voth, P. Salvador, J. J. Dannenberg, S. Dapprich, A. D. Daniels, Ö. Farkas, J. B. Foresman, J. V. Ortiz, J. Cioslowski, D. J. Fox and R. D. Gaussian 09, *Gaussian, Inc., Wallingford CT*, 2009.
8. Mariusz Mitoraj and A. Michalak, *J. Mol. Model*, 2007, **13**, 347-355.
9. M. P. Mitoraj, M. Parafiniuk, M. Srebro, M. Handzlik, A. Buczek and A. Michalak, *J. Mol. Model*, 2011, **17**, 2337-2352.
10. A. Michalak, M. Mitoraj and T. Ziegler, *J. Phys. Chem. A*, 2008, **112**, 1933-1939.
11. M. P. Mitoraj, A. Michalak and T. Ziegler, *J. Chem. Theory Comput.*, 2009, **5**, 962-975.
12. T. Ziegler and A. Rauk, *Theor. Chim. acta*, 1977, **46**, 1-10.
13. S.-W. Yeh, C.-W. Lin, B.-H. Liu, C.-C. Tsou, M.-L. Tsai and W.-F. Liaw, *Chem. Eur. J.*, 2015, **21**, 16035-16046.
14. T. Z. E.J. Baerends, A.J. Atkins, J. Autschbach, O. Baseggio, D. Bashford, A. Bérces, F.M. Bickelhaupt, C. Bo, P.M. Boerrigter, L. Cavallo, C. Daul, D.P. Chong, D.V. Chulhai, L. Deng, R.M. Dickson, J.M. Dieterich, D.E. Ellis, M. van Faassen, L. Fan, T.H. Fischer, C. Fonseca Guerra, M. Franchini, A. Ghysels, A. Giammona, S.J.A. van Gisbergen, A. Goetz, A.W. Götz, J.A. Groeneveld, O.V. Gritsenko, M. Grüning, S. Gusarov, F.E. Harris, P. van den Hoek, Z. Hu, C.R. Jacob, H. Jacobsen, L. Jensen, L. Joubert, J.W. Kaminski, G. van Kessel, C. König, F. Kootstra, A. Kovalenko, M.V. Krykunov, E. van Lenthe, D.A. McCormack, A. Michalak, M. Mitoraj, S.M. Morton, J. Neugebauer, V.P. Nicu, L. Noodleman, V.P. Osinga, S. Patchkovskii, M. Pavanello, C.A. Peebles, P.H.T. Philipsen, D. Post, C.C. Pye, H. Ramanantoanina, P. Ramos, W. Ravenek, J.I. Rodríguez, P. Ros, R. Rüger, P.R.T. Schipper, D. Schlüns, H. van Schoot, G. Schreckenbach, J.S.

- Seldenthuis, M. Seth, J.G. Snijders, M. Solà, M. Stener, M. Swart, D. Swerhone, V. Tognetti, G. te Velde, P. Vernooijs, L. Versluis, L. Visscher, O. Visser, F. Wang, T.A. Wesolowski, E.M. van Wezenbeek, G. Wiesenekker, S.K. Wolff, T.K. Woo, A.L. Yakovlev, *ADF2018, SCM, Theoretical Chemistry, Vrije Universiteit, Amsterdam, The Netherlands*.
15. E. F. Pettersen, T. D. Goddard, C. C. Huang, G. S. Couch, D. M. Greenblatt, E. C. Meng and T. E. Ferrin, *J. Comput. Chem.*, 2004, **25**, 1605-1612.
  16. L. J. Li, N. Reginato, M. Urschey, M. Stradiotto and J. D. Liarakos, *Can J Chem*, 2003, **81**, 468-475.
  17. C.-H. Hsieh and M. Y. Darensbourg, *J. Am. Chem. Soc.*, 2010, **132**, 14118-14125.
  18. J. L. Hess, C.-H. Hsieh, J. H. Reibenspies and M. Y. Darensbourg, *Inorg. Chem.*, 2011, **50**, 8541-8552.
  19. C.-H. Hsieh, R. Pulukkody and M. Y. Darensbourg, *Chem. Comm.*, 2013, **49**, 9326-9328.
  20. R. Pulukkody, S. J. Kyran, R. D. Bethel, C.-H. Hsieh, M. B. Hall, D. J. Darensbourg and M. Y. Darensbourg, *J. Am. Chem. Soc.*, 2013, **135**, 8423-8430.
  21. F.-T. Tsai, P.-L. Chen and W.-F. Liaw, *J. Am. Chem. Soc.*, 2010, **132**, 5290-5299.
  22. F.-C. Lo, Y.-C. Ho, P.-Y. Chang, G.-H. Lee, T.-S. Kuo, J.-L. Chen and C.-H. Chen, *Eur. J. Inorg. Chem.*, 2014, 3499-3509.
  23. S.-W. Yeh, C.-W. Lin, Y.-W. Li, I.-J. Hsu, C.-H. Chen, L.-Y. Jang, J.-F. Lee and W.-F. Liaw, *Inorg. Chem.*, 2012, **51**, 4076-4087.
  24. M.-C. Hung, M.-C. Tsai, G.-H. Lee and W.-F. Liaw, *Inorg. Chem.*, 2006, **45**, 6041-6047.
  25. L. Wang, H. Sun, Z. Zuo, X. Li, W. Xu, R. Langer, O. Fuhr and D. Fenske, *Eur. J. Inorg. Chem.*, 2016, 5205-5214.
  26. C. Bianchini, P. Innocenti, A. Meli, A. Orlandini and G. Scapacci, *J. Organomet. Chem.*, 1982, **233**, 233-246.
  27. Y. Gao, D. G. Holah, A. N. Hughes, G. J. Spivak, M. D. Havighurst, V. R. Magnuson and V. Polyakov, *Polyhedron*, 1997, **1997**, 2797-2807.
  28. B. Alvarez, S. García-Granda, Y. Jeannin, D. Miguel, J. A. Miguel and V. Riera, *Organometallics*, 1991, **10**, 3005-3007.
  29. C. E. Rao, S. K. Barik, K. Yuvaraj, K. Bakthavachalam, T. Roisnel, V. Dorcet, J.-F. Halet and S. Ghosh, *Eur. J. Inorg. Chem.*, 2016, 4913-4920.
